# Supplementary material for: Isolation and Identification of Lactic Acid Bacteria from Natural Whey Cultures of Buffalo and Cow Milk
Source: MDPI journal article supplement (doi:10.3390/foods11020233), 2022-01-16
Supplement: s1 [file s1]

Table S1: LAB isolated strains. The first three best results of V1-V3 sequence BLAST analysis are reported. Natural whey starter from cow (NWSc); natural whey starter from buffalo (NWSb); aerobiosis (AE); anaerobiosis (AN); Operational Taxonomic Unit (OTU); not applicable (na).

| ISOLATES | SOURCE/<br>MEDIUM-<br>Growth<br>conditions | V1-V3 SEQUENCE BLAST ANALYSIS                                                                                                | SPECIE/SUBSPECIE SPECIFIC<br>PCR ANALYSIS | RAPD-PCR<br>CLUSTERING |
|----------|--------------------------------------------|------------------------------------------------------------------------------------------------------------------------------|-------------------------------------------|------------------------|
| I1       | NWSc/MRS<br>30°C-AE                        | Lactococcus lactis subsp. cremoris (98%)<br>Lactococcus lactis subsp. hordniae (98%)<br>Lactococcus lactis strain NBRC (98%) | <i>Lactococcus lactis subsp.lactis</i>    | OTU 1                  |
| I2       |                                            | Lactococcus lactis subsp. hordniae (98%)<br>Lactococcus lactis strain NBRC (98%)<br>Lactococcus lactis subsp. tructae (98%)  | <i>Lactococcus lactis subsp.lactis</i>    | OTU 2                  |
| I3       |                                            | Lactococcus lactis subsp. cremoris (98%)<br>Lactococcus lactis subsp. hordniae (98%)<br>Lactococcus lactis strain NBRC (97%) | <i>Lactococcus lactis subsp.lactis</i>    | OTU 1                  |
| I4       |                                            | Lactococcus lactis subsp. cremoris (97%)<br>Lactococcus lactis subsp. hordniae (97%)<br>Lactococcus lactis strain NBRC (97%) | <i>Lactococcus lactis subsp.lactis</i>    | OTU 3                  |
| I5       |                                            | Lactococcus lactis subsp cremoris (98%)<br>Lactococcus lactis subsp hordniae (98% )<br>Lactococcus taiwanensis (98%)         | <i>Lactococcus lactis subsp.lactis</i>    | OTU 4                  |
| I6       |                                            | Lactococcus lactis strain NBRC (99%)<br>Lactococcus lactis strain NCD0 (99%)<br>Lactococcus lactis subsp hordniae (99%)      | <i>Lactococcus lactis subsp.lactis</i>    | OTU 5                  |



|     |                     |                                                                                                                            |                                        |       |
|-----|---------------------|----------------------------------------------------------------------------------------------------------------------------|----------------------------------------|-------|
| I7  |                     | Lactococcus lactis strain NBRC (92%)<br>Lactococcus lactis strain NCDO (92%)<br>Lactococcus taiwanensis (96%)              | <i>Lactococcus lactis subsp.lactis</i> | OTU 6 |
| I8  |                     | Enterococcus faecium NBRC100485 (98%)<br>Enterococcus faecium NBRC 100486 (98%)<br>Enterococcus thailandicus (98%)         | <i>Enterococcus faecium</i>            | na    |
| I9  |                     | Lactococcus lactis subsp cremoris (99%)<br>Lactococcus lactis subsp hordniae (99%)<br>Lactococcus lactis strain NBRC (99%) | <i>Lactococcus lactis subsp.lactis</i> | OTU 1 |
| I10 |                     | Enterococcus faecium NBRC 100485 (96%)<br>Enterococcus faecium NBRC 100486 (96%)<br>Enterococcus thailandicus (96%)        | <i>Enterococcus faecium</i>            | na    |
| L1  | NWSc/MRS<br>30°C-AN | Lactococcus lactis strain NBRC (99%)<br>Lactococcus lactis strain NCDO (99%)<br>Lactococcus lactis subsp. hordniae (99%)   | <i>Lactococcus lactis subsp.lactis</i> | na    |
| L6  |                     | Lactococcus taiwanensis (99%)<br>Lactococcus lactis subsp. cremoris (99%)<br>Lactococcus lactis subsp. hordniae (99%)      | <i>Lactococcus lactis subsp.lactis</i> | na    |
| L7  |                     | Lactococcus taiwanensis (99%)<br>Lactococcus lactis subsp. cremoris (99%)<br>Lactococcus lactis subsp. hordniae (99%)      | <i>Lactococcus lactis subsp.lactis</i> | na    |
| L8  |                     | Lactococcus taiwanensis (99%)<br>Lactococcus lactis subsp. cremoris (99%)<br>Lactococcus lactis subsp. hordniae (99%)      | <i>Lactococcus lactis subsp.lactis</i> | na    |
| L9  |                     | Lactococcus taiwanensis (99%)<br>Lactococcus lactis subsp. cremoris (99%)<br>Lactococcus lactis subsp. hordniae (99%)      | <i>Lactococcus lactis subsp.lactis</i> | na    |



|     |                      |                                                                                                                              |                                        |       |
|-----|----------------------|------------------------------------------------------------------------------------------------------------------------------|----------------------------------------|-------|
| L10 |                      | Lactococcus taiwanensis (99%)<br>Lactococcus lactis subsp. cremoris (99%)<br>Lactococcus lactis subsp. hordniae (99%)        | <i>Lactococcus lactis subsp.lactis</i> | na    |
| M1  | NWSc/ESTY<br>30°C-AE | Enterococcus faecium NBRC100486 (97%)<br>Enterococcus faecium NBRC100485 (97%)<br>Enterococcus durans (97%)                  | <i>Enterococcus faecium</i>            | na    |
| M3  |                      | Enterococcus faecium NBRC100486 (97%)<br>Enterococcus faecium NBRC100485 (97%)<br>Enterococcus thailandicus (97%)            | <i>Enterococcus faecium</i>            | na    |
| M5  |                      | Enterococcus faecium NBRC100486 (97%)<br>Enterococcus faecium NBRC100485 (97%)<br>Enterococcus thailandicus (97%)            | <i>Enterococcus faecium</i>            | na    |
| M7  |                      | Lactococcus lactis cremoris (98%)<br>Lactococcus lactis hordniae (98%)<br>Lactococcus lactis strain NBRC (98%)               | <i>Lactococcus lactis subsp.lactis</i> | OTU 1 |
| M8  |                      | Lactococcus lactis subsp. cremoris (98%)<br>Lactococcus lactis subsp. hordniae (98%)<br>Lactococcus lactis subsp. NBRC (98%) | <i>Lactococcus lactis subsp.lactis</i> | OTU 1 |
| M9  |                      | Lactococcus lactis subsp. cremoris (99%)<br>Lactococcus lactis subsp. hordniae (99%)<br>Lactococcus lactis strain NBRC (99%) | <i>Lactococcus lactis subsp.lactis</i> | OTU 1 |
| M10 |                      | Lactococcus lactis subsp. cremoris (98%)<br>Lactococcus lactis subsp. hordniae (98%)<br>Lactococcus lactis strain NBRC (98%) | <i>Lactococcus lactis subsp.lactis</i> | OTU 1 |
| N1  | NWSc/ESTY<br>30°C-AN | Enterococcus faecium NBRC100486 (97%)<br>Enterococcus faecium NBRC100485 (97%)<br>Enterococcus thailandicus (97%)            | <i>Enterococcus faecium</i>            | na    |



|    |                      |                                                                                                                   |                                   |    |
|----|----------------------|-------------------------------------------------------------------------------------------------------------------|-----------------------------------|----|
| N2 |                      | Enterococcus faecium NBRC100486 (96%)<br>Enterococcus faecium NBRC100485 (96%)<br>Enterococcus thailandicus (96%) | <i>Enterococcus faecium</i>       | na |
| N3 |                      | Streptococcus thermophilus ATCC (97%)<br>Streptococcus thermophilus DSH (96%)<br>Streptococcus vestibularis (96%) | <i>Streptococcus thermophilus</i> | na |
| N5 |                      | Enterococcus hirae (99%)<br>Enterococcus faecium (99%)<br>Enterococcus hirae (99%)                                | <i>Enterococcus faecium</i>       | na |
| Q1 | NWSc/ESTY<br>44°C-AE | Streptococcus thermophilus (99%)<br>Streptococcus salivarius (99%)<br>Streptococcus thermophilus (98%)            | <i>Streptococcus thermophilus</i> | na |
| Q2 |                      | Streptococcus thermophilus (99%)<br>Streptococcus salivarius (99%)<br>Streptococcus thermophilus (98%)            | <i>Streptococcus thermophilus</i> | na |
| Q3 |                      | Streptococcus thermophilus (99%)<br>Streptococcus salivarius (99%)<br>Streptococcus thermophilus (98%)            | <i>Streptococcus thermophilus</i> | na |
| Q4 |                      | Streptococcus thermophilus (99%)<br>Streptococcus vestibularis (94%)<br>Streptococcus salivarius (94%)            | <i>Streptococcus thermophilus</i> | na |
| Q5 |                      | Streptococcus thermophilus (99%)<br>Streptococcus salivarius (99%)<br>Streptococcus vestibularis (99%)            | <i>Streptococcus thermophilus</i> | na |
| Q6 |                      | Streptococcus thermophilus (99%)<br>Streptococcus salivarius (99%)<br>Streptococcus vestibularis (99%)            | <i>Streptococcus thermophilus</i> | na |



|     |                     |                                                                                                                                 |                                        |       |
|-----|---------------------|---------------------------------------------------------------------------------------------------------------------------------|----------------------------------------|-------|
| Q7  |                     | Streptococcus thermophilus (99%)<br>Streptococcus salivarius (99%)<br>Streptococcus vestibularis (99%)                          | <i>Streptococcus thermophilus</i>      | na    |
| Q10 |                     | Streptococcus thermophilus (99%)<br>Streptococcus salivarius (99%)<br>Streptococcus vestibularis (99%)                          | <i>Streptococcus thermophilus</i>      | na    |
| O3  | NWSc/BHI<br>37°C-AE | Enterococcus faecium (98%)<br>Enterococcus hirae (98%)<br>Enterococcus faecium (97%)                                            | <i>Enterococcus faecium</i>            | na    |
| O4  |                     | Enterococcus faecium (98%)<br>Enterococcus hirae (98%)<br>Enterococcus faecium (97%)                                            | <i>Enterococcus faecium</i>            | na    |
| O5  |                     | Enterococcus faecium (98%)<br>Enterococcus hirae (98%)<br>Enterococcus faecium (97%)                                            | <i>Enterococcus faecium</i>            | na    |
| O6  |                     | Enterococcus faecium (97%)<br>Enterococcus hirae (97%)<br>Enterococcus faecium (97%)                                            | <i>Enterococcus faecium</i>            | na    |
| O7  |                     | Enterococcus faecium (98%)<br>Enterococcus faecium (98%)<br>Enterococcus hirae (97%)                                            | <i>Enterococcus faecium</i>            | na    |
| O8  |                     | Enterococcus faecium (97%)<br>Enterococcus faecium (97%)<br>Enterococcus hirae (97%)                                            | <i>Enterococcus faecium</i>            | na    |
| A2  | NWSb/MRS<br>30°C-AE | Lactococcus lactis subsp. cremoris (93%)<br>Lactococcus lactis subsp. hordniae (93%)<br>Lactococcus lactis subsp. tructae (93%) | <i>Lactococcus lactis subsp.lactis</i> | OTU 8 |



|     |                                                                                                                                |                                        |        |
|-----|--------------------------------------------------------------------------------------------------------------------------------|----------------------------------------|--------|
| A3  | Lactococcus lactis (98%)<br>Lactococcus lactis (98%)<br>Lactococcus lactis subsp. hordniae (97%)                               | <i>Lactococcus lactis subsp.lactis</i> | OTU 9  |
| A4  | Lactococcus lactis subsp. cremoris 93%<br>Lactococcus lactis subsp. hordniae 93%<br>Lactococcus lactis strain NBRC 93%         | <i>Lactococcus lactis subsp.lactis</i> | na     |
| A5  | Lactococcus lactis subsp. Hordniae (98%)<br>Lactococcus lactis subsp. hordniae (98%)<br>Lactococcus lactis subsp. tructe (98%) | <i>Lactococcus lactis subsp.lactis</i> | OTU 10 |
| A8  | Lactococcus lactis strain NBRC (96%)<br>Lactococcus lactis strain NCDO 96%<br>Lactococcus lactis subsp. hordniae 96%           | <i>Lactococcus lactis subsp.lactis</i> | na     |
| A17 | Lactococcus lactis (100%)<br>Lactococcus lactis (100%)<br>Lactococcus lactis subsp. hordniae (99%)                             | <i>Lactococcus lactis subsp.lactis</i> | na     |
| A25 | Lactococcus lactis (100%)<br>Lactococcus lactis (100%)<br>Lactococcus lactis subsp. hordniae (99%)                             | <i>Lactococcus lactis subsp.lactis</i> | na     |
| A30 | Lactococcus lactis strain NBRC (99%)<br>Lactococcus lactis strain NCDO (99%)<br>Lactococcus lactis subsp. hordniae (99%)       | <i>Lactococcus lactis subsp.lactis</i> | na     |
| A40 | Lactococcus lactis subsp. cremoris (99%)<br>Lactococcus lactis subsp. hordniae (99%)<br>Lactococcus lactis (99%)               | <i>Lactococcus lactis subsp.lactis</i> | na     |
| A45 | Lactococcus lactis subsp. hordniae (100%)<br>Lactococcus lactis (100%)<br>Lactococcus lactis subsp. tructae (100%)             | <i>Lactococcus lactis subsp.lactis</i> | na     |



|     |                      |                                                                                                                                     |                                        |        |
|-----|----------------------|-------------------------------------------------------------------------------------------------------------------------------------|----------------------------------------|--------|
| A48 |                      | Lactococcus lactis subsp. cremoris (99%)<br>Lactococcus lactis subsp. hordniae (99%)<br>Lactococcus lactis strain NBRC (99%)        | <i>Lactococcus lactis subsp.lactis</i> | na     |
| A50 |                      | Lactococcus lactis subsp. cremoris (100%)<br>Lactococcus lactis subsp. hordniae (100%)<br>Lactococcus lactis (100%)                 | <i>Lactococcus lactis subsp.lactis</i> | na     |
| B1  | NWSb/MRS<br>30°C-AN  | Lactococcus lactis subsp. lactis (99%)<br>Lactococcus lactis subsp. lactis (98%)<br>Lactococcus lactis subsp. hordniae (97%)        | <i>Lactococcus lactis subsp.lactis</i> | OTU 11 |
| D1  | NWSb/ESTY<br>30°C-AN | Lactococcus lactis subsp. lactis (99%)<br>Lactobacillus delbrueckii subsp. lactis (99%)<br>Lactococcus lactis subsp. cremoris (99%) | <i>Lactococcus lactis subsp.lactis</i> | OTU 12 |
| D2  |                      | Lactococcus lactis subsp. Lactis (98%)<br>Lysinibacillus fusiformis (95%)<br>Lysinibacillus fusiformis (95%)                        | <i>Lactococcus lactis subsp.lactis</i> | OTU 10 |
| D3  |                      | Lactococcus lactis subsp. Lactis (99%)<br>Lactobacillus delbrueckii subsp. lactis (99%)<br>Streptococcus sp. (92%)                  | <i>Lactococcus lactis subsp.lactis</i> | OTU 14 |
| D4  |                      | Streptococcus thermophilus (99%)<br>Streptococcus sp. (97%)<br>Streptococcus salivarius (84%)                                       | <i>Streptococcus thermophilus</i>      | na     |
| D5  |                      | Lactococcus lactis subsp. Lactis (93%)<br>Lactobacillus delbrueckii subsp. lactis (93%)<br>Streptococcus sp. (93%)                  | <i>Lactococcus lactis subsp.lactis</i> | OTU 15 |
| MS2 |                      | Lactococcus lactis strain NBRC (99%)<br>Lactococcus lactis supsp. lactis (98%)<br>Lactococcus lactis subsp. hordniae (98%)          | <i>Lactococcus lactis subsp.lactis</i> | OTU 16 |



|     |                      |                                                                                                                                                           |                                        |        |
|-----|----------------------|-----------------------------------------------------------------------------------------------------------------------------------------------------------|----------------------------------------|--------|
| MS9 |                      | Lactococcus lactis subsp. lactis (98%)<br>Lactococcus lactis subsp. hordniae (98%)<br>Lactococcus lactis strain NBRC (98%)                                | <i>Lactococcus lactis subsp.lactis</i> | OTU 17 |
| E3  | NWSb/MRS<br>44°C-AN  | Streptococcus thermophilus (98%)<br>Streptococcus salivarius (97%)<br>Streptococcus thermophilus (97%)                                                    | <i>Streptococcus thermophilus</i>      | na     |
| E5  |                      | Streptococcus thermophilus (99%)<br>Streptococcus salivarius (98%)<br>Streptococcus thermophilus (98%)                                                    | <i>Streptococcus thermophilus</i>      | na     |
| E8  |                      | Streptococcus thermophilus (98%)<br>Streptococcus thermophilus (96%)<br>Streptococcus salivarius (92%)                                                    | <i>Streptococcus thermophilus</i>      | na     |
| E10 |                      | Lactobacillus fermentum (92%)<br>Lactobacillus fermentum (90%)<br>Lactobacillus sp. (90%)                                                                 | <i>Lactobacillus fermentum</i>         | na     |
| F3  | NWSb/ESTY<br>44°C-AE | Lactobacillus delbrueckii subsp.delbrueckii (98%)<br>Lactobacillus delbrueckii subsp.lactis (97%)<br>Lactobacillus delbrueckii subsp.bulgaricus (97%)     | <i>Lactobacillus delbrueckii</i>       | na     |
| G1  | NWSb/ESTY<br>44°C-AN | Lactobacillus delbrueckii subsp.bulgaricus (98%)<br>Lactobacillus delbrueckii subsp. indicus (98%)<br>Lactobacillus delbrueckii subsp.delbrueckii (97%)   | <i>Lactobacillus delbrueckii</i>       | na     |
| G3  |                      | Lactobacillus delbrueckii subsp. bulgaricus (98%)<br>Lactobacillus delbrueckii subsp. delbrueckii (97%)<br>Lactobacillus leichmannii (94%)                | <i>Lactobacillus delbrueckii</i>       | na     |
| G5  |                      | Lactobacillus delbrueckii subsp. bulgaricus (98%)<br>Lactobacillus delbrueckii subsp. indicus (98%)<br>Lactobacillus delbrueckii subsp. delbrueckii (97%) | <i>Lactobacillus delbrueckii</i>       | na     |
